# Supplementary material for: Does maximization of net carbon profit enable the prediction of vegetation behaviour in savanna sites along a precipitation gradient?
Source: Copernicus journal article supplement (doi:10.5194/hess-2021-265), 2021-06-11
Supplement: Supplementary file 1 [file S1_weatherdata.pdf › supplements/S1_weatherdata.pdf]

# Supplement S1

March 1, 2021

# 1 Weatherdata

## 1.1 Timeseries

### 1.1.1 Precipitation

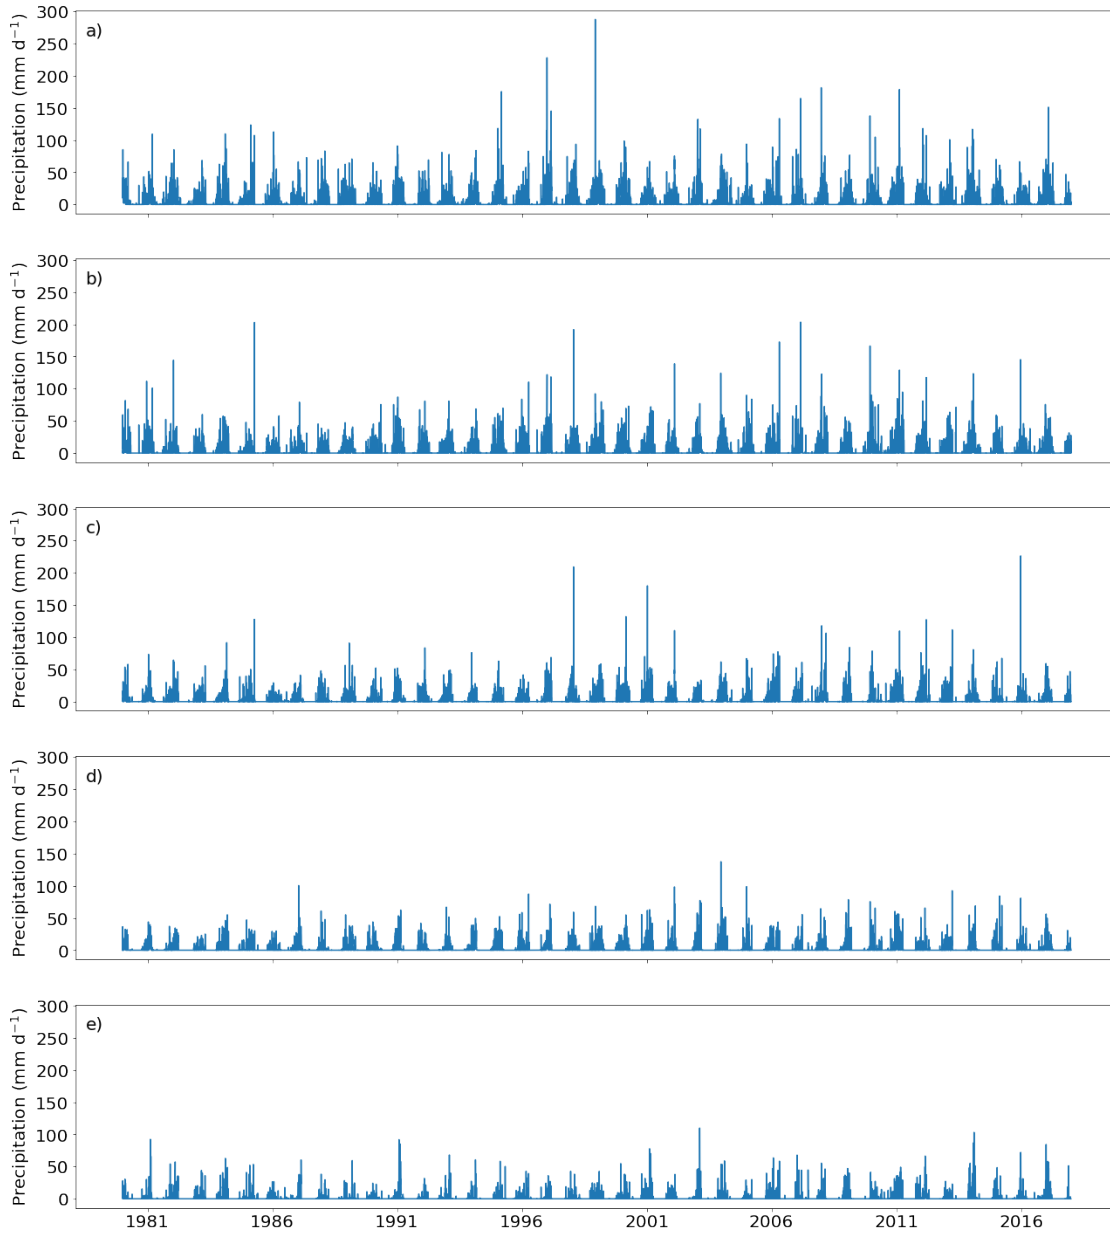

**Figure S1.1** Precipitation timeseries for a) Howard Springs, b) Adelaide River, c) Daly Uncleared, d) Dry River and e) Sturt Plains.

### 1.1.2 Temperature

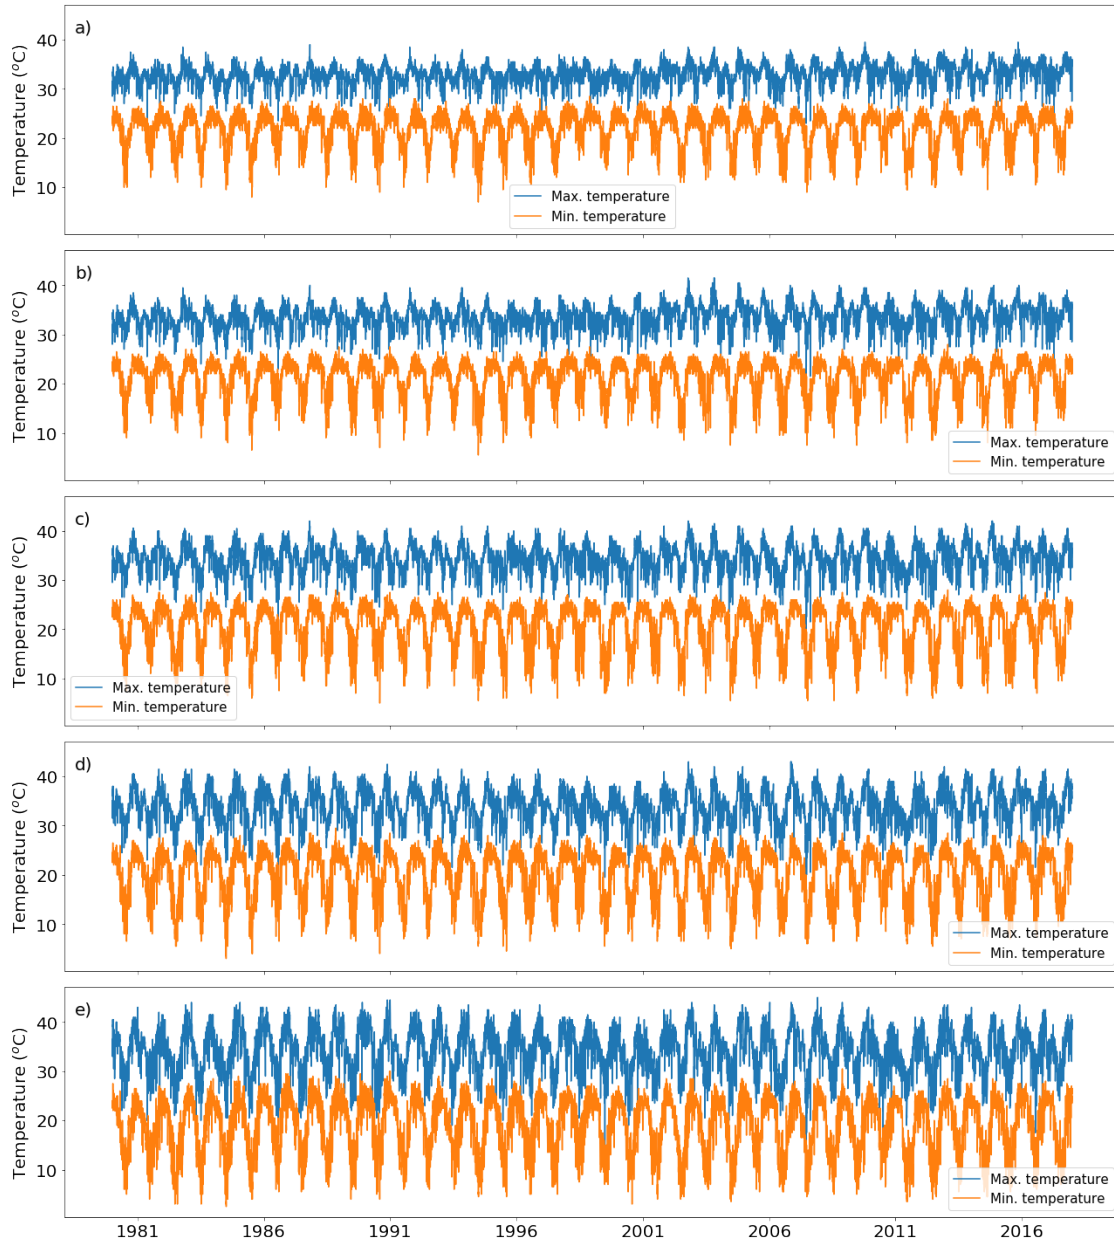

**Figure S1.2** Daily temperature timeseries with daily maximum temperatures in blue and daily minimum temperatures in red for a) Howard Springs, b) Adelaide River, c) Daly Uncleared, d) Dry River and e) Sturt Plains.

### 1.1.3 Incoming shortwave radiation

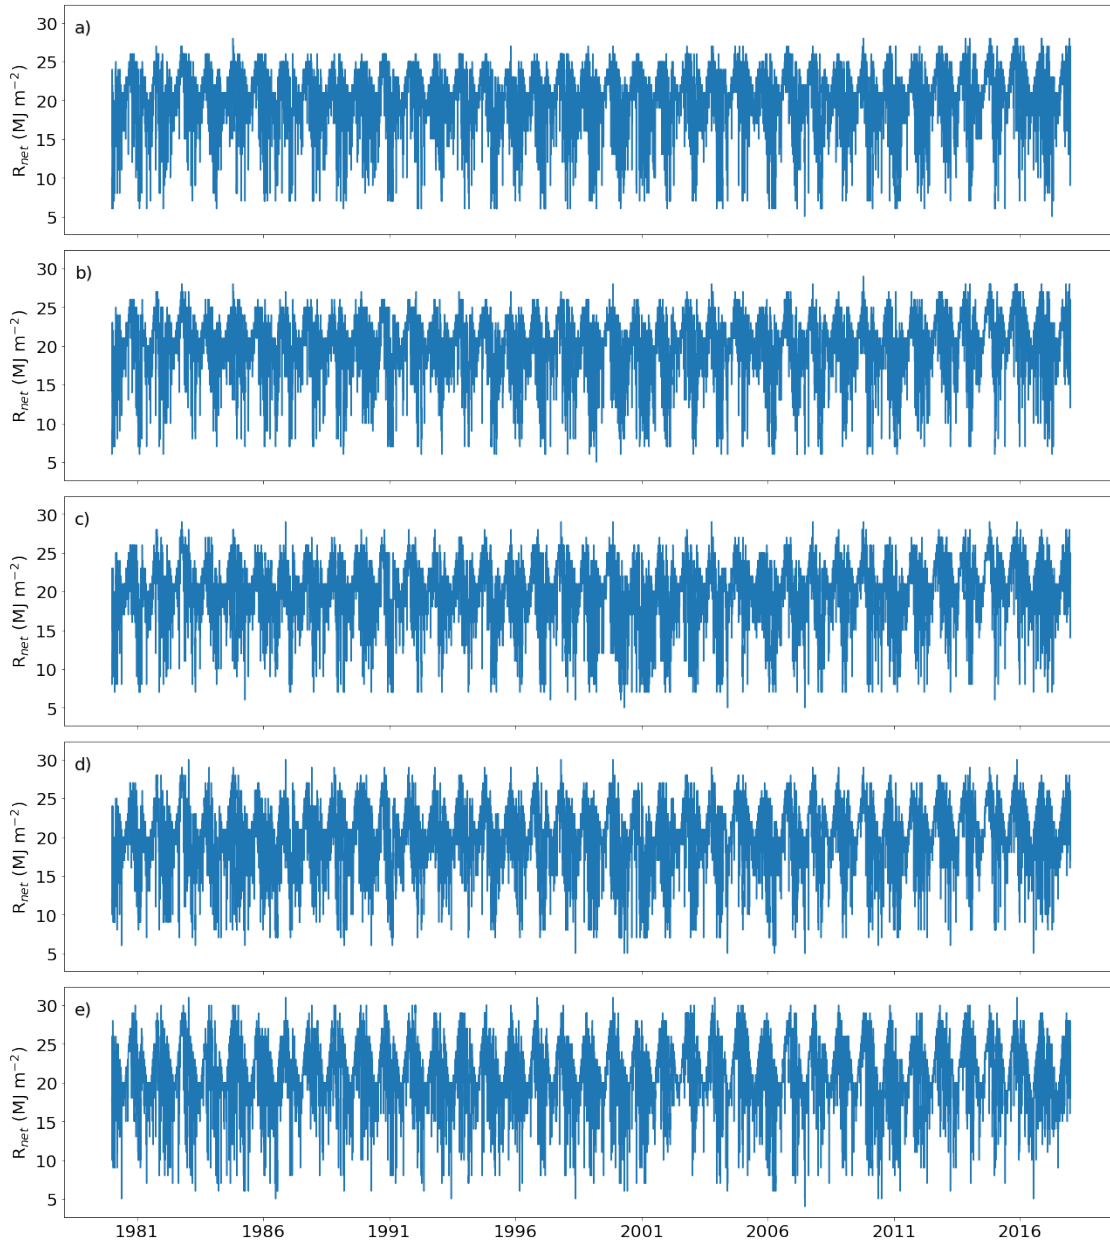

**Figure S1.3** Incoming shortwave radiation for a) Howard Springs, b) Adelaide River, c) Daly Uncleared, d) Dry River and e) Sturt Plains.

### 1.1.4 Vapour pressure

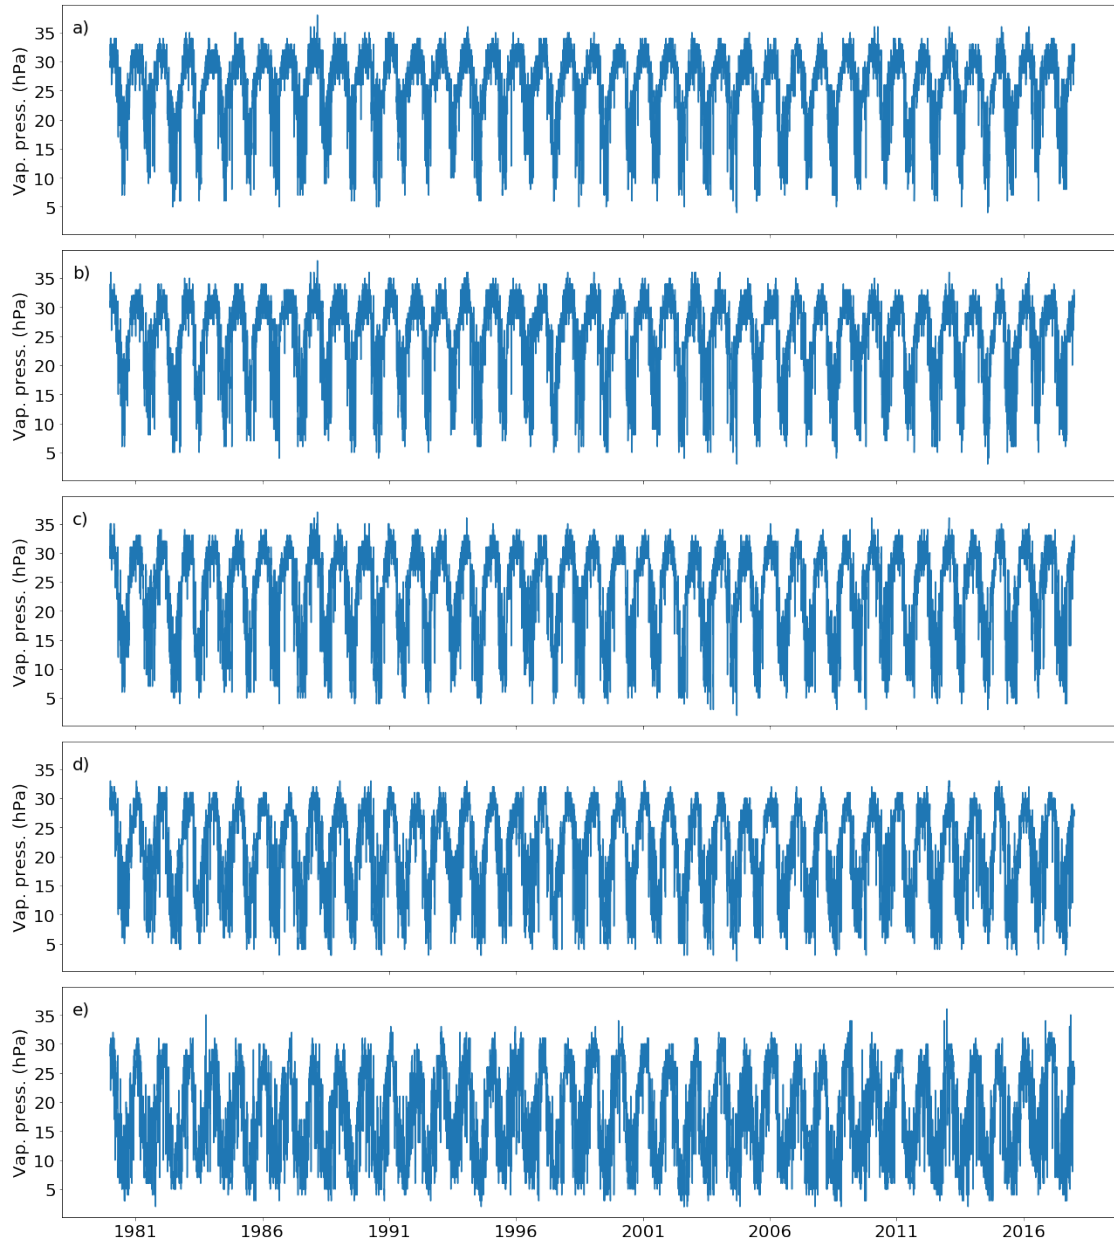

**Figure S1.4** Vapour pressure for a) Howard Springs, b) Adelaide River, c) Daly Uncleared, d) Dry River and e) Sturt Plains.

### 1.1.5 Atmospheric pressure

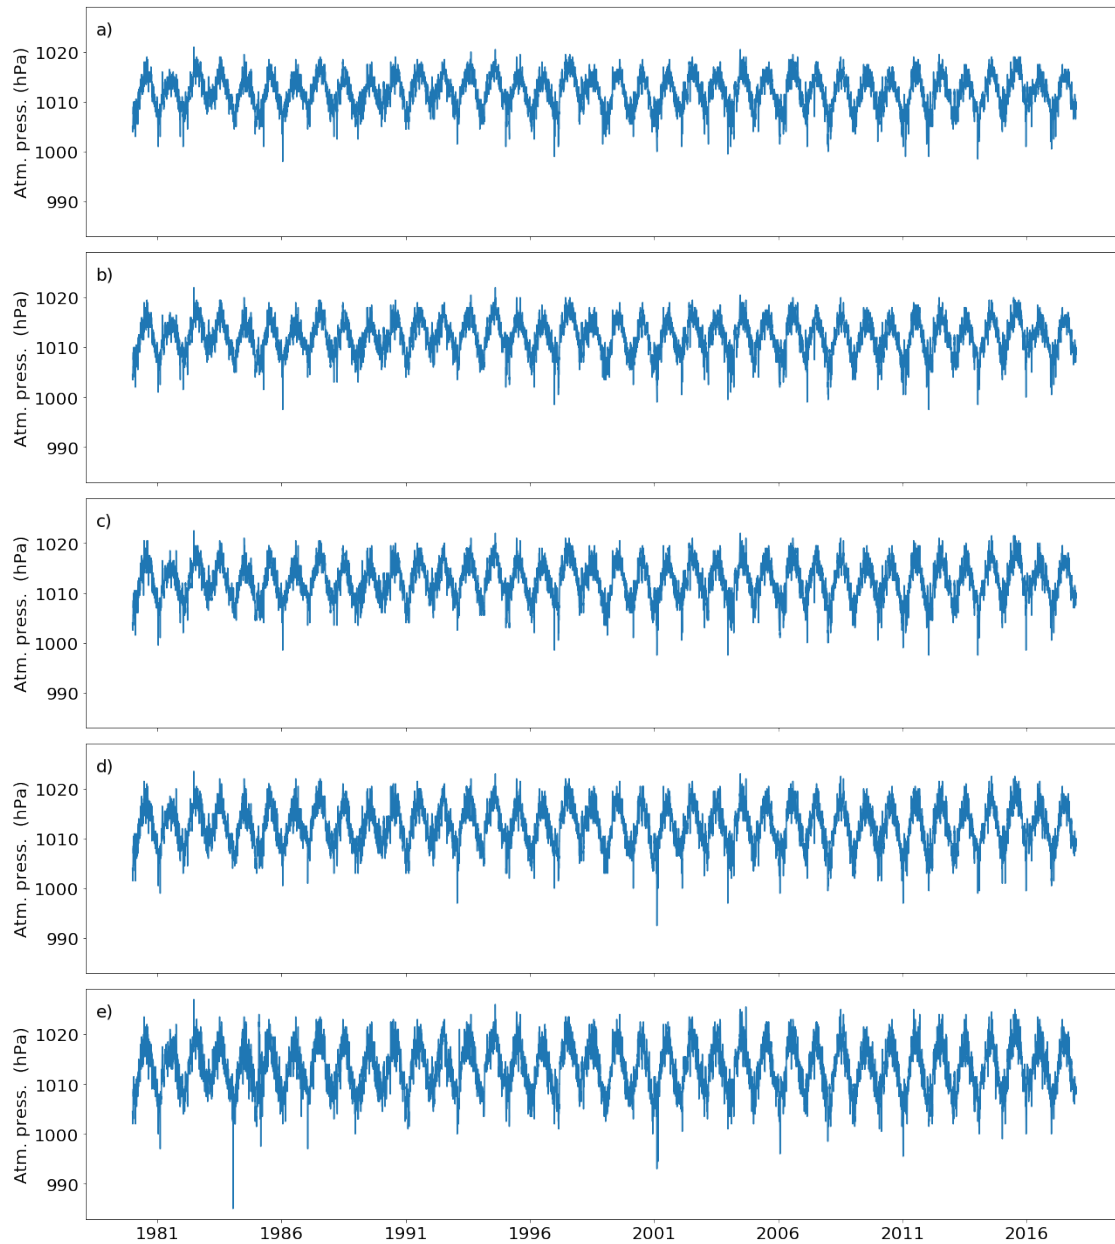

**Figure S1.5** Atmospheric air pressure for a) Howard Springs, b) Adelaide River, c) Daly Uncleared, d) Dry River and e) Sturt Plains.

### 1.1.6 Atmospheric CO<sub>2</sub>-levels

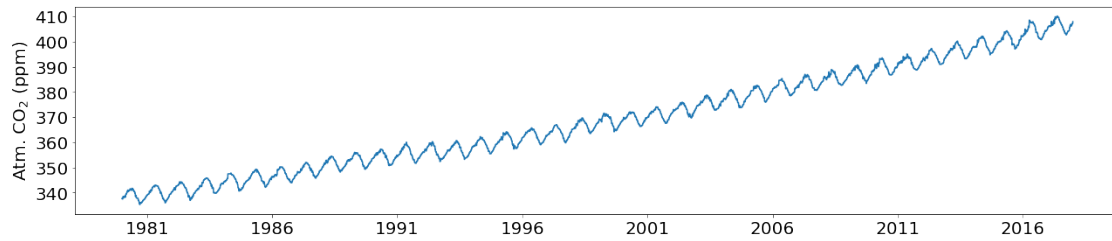

**Figure S1.6** *Atmospheric CO<sub>2</sub>-levels used for Howard Springs, Adelaide River, Daly Uncleared, Dry River and Sturt Plains.*

## 1.2 Mean Annual Values

|                | prec.<br>(mm year <sup>-1</sup> ) | pot. evap<br>(mm year <sup>-1</sup> ) | aridity<br>(-) | net radiation<br>(MJ m <sup>-2</sup> year <sup>-1</sup> ) | max.temp<br>(°C) | min.temp<br>(°C) |
|----------------|-----------------------------------|---------------------------------------|----------------|-----------------------------------------------------------|------------------|------------------|
| Howard Springs | 1746.61                           | 1763.28                               | 1.03           | 4392.15                                                   | 27.36            | 37.46            |
| Adelaide River | 1497.83                           | 1802.22                               | 1.18           | 4313.19                                                   | 26.63            | 38.84            |
| Daly Uncleared | 1165.62                           | 1895.54                               | 1.48           | 4215.41                                                   | 26.86            | 40.57            |
| Dry River      | 898.36                            | 1948.26                               | 1.87           | 4104.89                                                   | 27.68            | 41.14            |
| Sturt Plains   | 616.46                            | 2081.91                               | 2.70           | 4079.21                                                   | 28.14            | 42.97            |

**Table S1.1** *Mean annual values of precipitation, daily maximum and daily minimum temperatures for the different sites.*

### 1.3 Mean monthly values

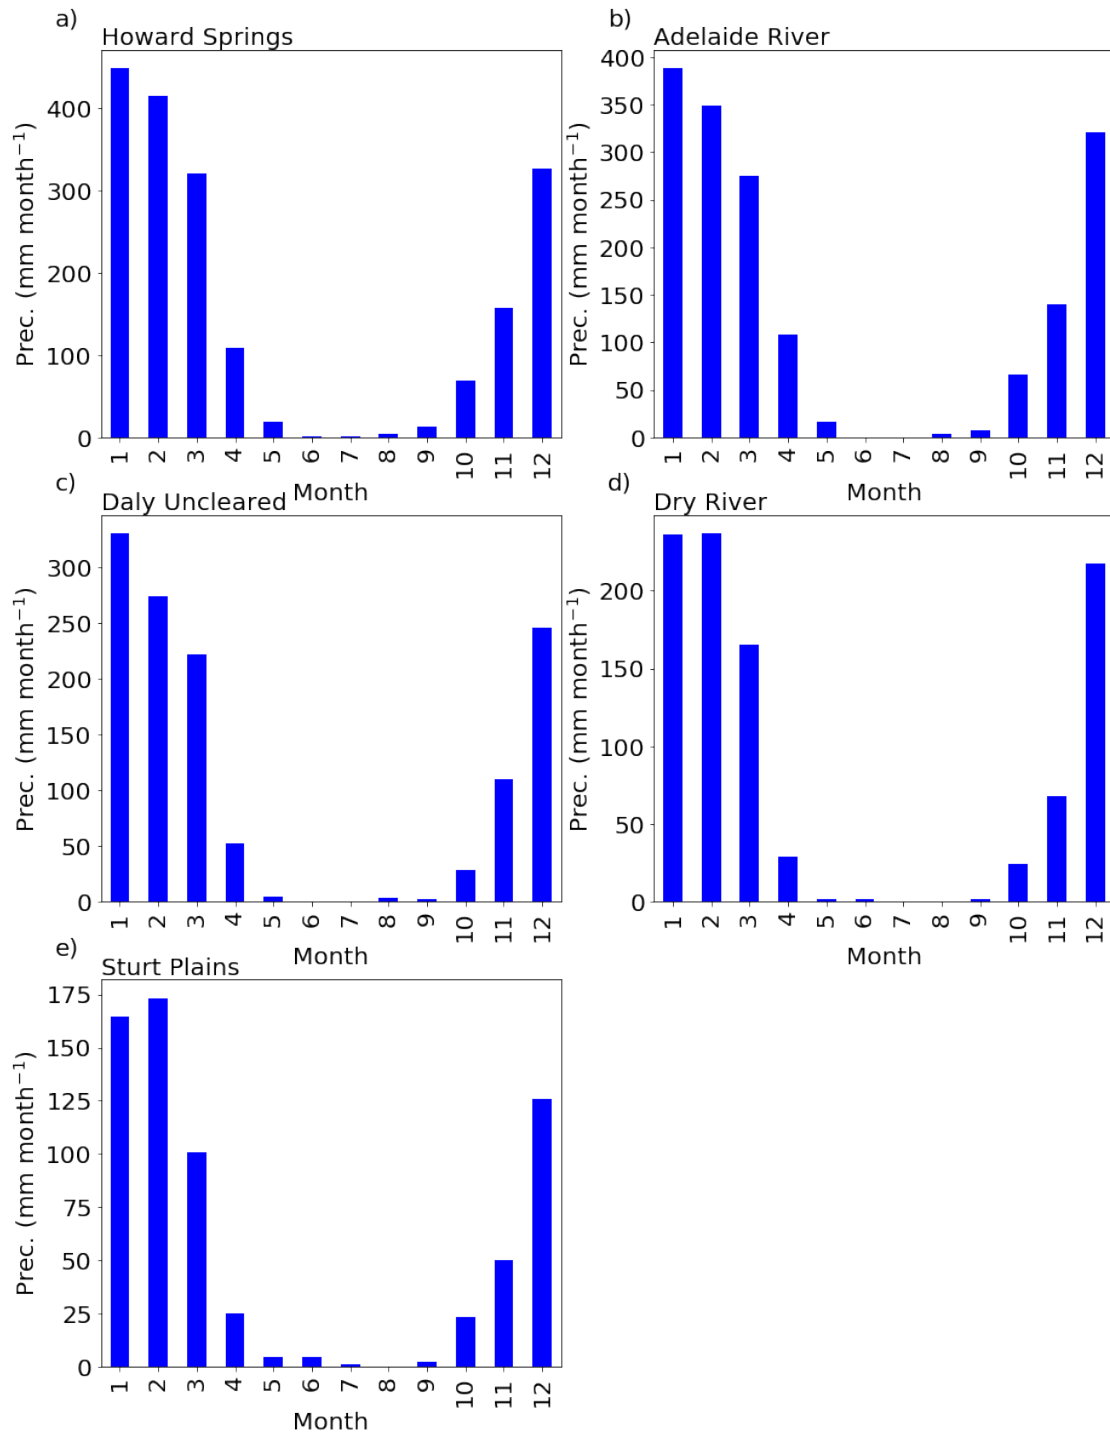

**Figure S1.7** Mean monthly precipitation for a) Howard Springs, b) Adelaide River, c) Daly Uncleared, d) Dry River and e) Sturt Plains.
