# Supplementary material for: Does maximization of net carbon profit enable the prediction of vegetation behaviour in savanna sites along a precipitation gradient?
Source: Copernicus journal article supplement (doi:10.5194/hess-2021-265), 2021-06-11
Supplement: Supplementary file 6 [file S6_model_details.pdf › supplements/S6_model_details.pdf]

# Supplement S6

May 11, 2021

## **1 Model Details**

**Table S6.1.** Time periods for the different models per site that overlap with the flux tower observations, and that are used for model evaluation.

|           | Howard Springs      | Adelaide River      | Daly Uncleared       | Dry River            | Sturt Plains         |
|-----------|---------------------|---------------------|----------------------|----------------------|----------------------|
| BESS      | 7-8-2001–27-12-2012 | 1-1-2007–24-5-2009  | 19-2-2007–27-12-2012 | 31-8-2008–27-12-2012 | 28-8-2008–27-12-2012 |
| BIOS2     | 7-8-2001–31-12-2013 | 1-1-2007–24-5-2009  | 19-2-2007–31-12-2013 | 31-8-2008–31-12-2013 | 28-8-2008–31-12-2013 |
| LPJ-GUESS | 7-8-2001–26-6-2013  | 1-1-2007–23-5-2009  | 19-2-2007–21-7-2013  | 31-8-2008–10-6-2013  | 28-8-2008–11-6-2013  |
| MAESPA    | 7-8-2001–27-6-2013  | 1-1-2007–24-5-2009  | 19-2-2007–22-7-2013  | 31-8-2008–11-6-2013  | 28-8-2008–12-6-2013  |
| SPA       | 7-8-2001–25-6-2013  | 1-1-2007–23-5-2009  | 1-1-2008–31-12-2013  | 31-8-2008–31-12-2012 | 28-8-2008–31-12-2012 |
| CABLE     | 7-8-2001–29-12-2012 | 1-1-2007–31-12-2008 | 19-2-2007–30-12-2012 | 31-8-2008–30-12-2012 | 28-8-2008–30-12-2012 |
| VOM       | 7-8-2001–21-12-2016 | 1-1-2007–24-5-2009  | 19-2-2007–21-12-2016 | 31-8-2008–21-12-2016 | 28-8-2008–21-12-2016 |

**Table S6.2.** Vegetation properties in the Vegetation Optimality Model optimized for maximizing the Net Carbon Profit.

| Parameter            | Description                                            | Initial range    | Timescale | Unit                                |
|----------------------|--------------------------------------------------------|------------------|-----------|-------------------------------------|
| $c_{\lambda f,p}$    | water use parameter perennial vegetation               | 0.0 - 10000.0    | Long-term | $\text{mol mol}^{-1} \text{m}^{-1}$ |
| $c_{\lambda e,p}$    | water use parameter perennial vegetation               | -3.0 - 0.0       | Long-term | -                                   |
| $c_{\lambda f,s}$    | water use parameter seasonal vegetation                | 0.0 - 10000.0    | Long-term | $\text{mol mol}^{-1} \text{m}^{-1}$ |
| $c_{\lambda e,s}$    | water use parameter seasonal vegetation                | -3.0 - 0.0       | Long-term | -                                   |
| $M_{A,p}$            | fractional cover perennial vegetation                  | 0 - 1            | Long-term | -                                   |
| $y_{r,p}$            | rooting depth perennial vegetation                     | 1.0 - 9.0        | Long-term | m                                   |
| $y_{r,s}$            | rooting depth seasonal vegetation                      | 0.05 - 2         | Long-term | m                                   |
| $M_{A,s}$            | fractional cover seasonal vegetation                   | 0.00 - (1.0-pct) | Daily     | -                                   |
| $J_{\max 25,p}$      | electron transport capacity perennial vegetation       | -                | Daily     | $\text{mol s}^{-1} \text{m}^{-2}$   |
| $J_{\max 25,s}$      | electron transport capacity annual vegetation          | -                | Daily     | $\text{mol s}^{-1} \text{m}^{-2}$   |
| $G_{s,p}$            | stomatal conductance perennial vegetation              | -                | Daily     | $\text{mol s}^{-1} \text{m}^{-2}$   |
| $G_{s,s}$            | stomatal conductance seasonal vegetation               | -                | Daily     | $\text{mol s}^{-1} \text{m}^{-2}$   |
| $S_{\text{Adr},i,s}$ | root surface area distribution of perennial vegetation | -                | Daily     | $\text{m}^2 \text{m}^{-3}$          |
| $S_{\text{Adr},i,s}$ | root surface area distribution of annual vegetation    | -                | Daily     | $\text{m}^2 \text{m}^{-3}$          |
